# Supplementary material for: miR-363-3p inhibits rat lung alveolar type II cell proliferation by downregulating STRA6 expression and induces cell apoptosis via cellular oxidative stress and G1-phase cell cycle arrest
Source: PubMed Central journal article supplement — Transl Pediatr. 2021 Aug;10(8):2095–105. doi: 10.21037/tp-21-303 (PMC8429880; doi:10.21037/tp-21-303), 2021-08
Supplement: tp-10-08-2095-dss.pdf [file tp-10-08-2095-dss.pdf]

## Data Sharing Statement

|                     |                                                                                                                                                     |                                                                                                                  |
|---------------------|-----------------------------------------------------------------------------------------------------------------------------------------------------|------------------------------------------------------------------------------------------------------------------|
| <b>Article Info</b> | <a href="https://dx.doi.org/10.21037/tp-21-303">https://dx.doi.org/10.21037/tp-21-303</a>                                                           |                                                                                                                  |
| <b>Item</b>         | <b>Question</b>                                                                                                                                     | <b>Authors' Response<br/>(place "-" if not applicable)</b>                                                       |
| 1                   | Would you like to share data collected for your study to others?                                                                                    | Yes.                                                                                                             |
| 2                   | If not, would you like to share the reason for your decision?                                                                                       | -                                                                                                                |
| 3                   | What data in particular will be shared?                                                                                                             | We will share the raw data.                                                                                      |
| 4                   | Any other documents will be shared? Such as study protocol, statistical analysis plan, informed consent form, clinical study report, analytic code. | Statistical analysis plan will also be shared if requested.                                                      |
| 5                   | When will data availability begin?                                                                                                                  | From the publication date.                                                                                       |
| 6                   | When will data availability end?                                                                                                                    | One year within the publication date, since the technique or survival date may be updated over time.             |
| 7                   | To whom will you share the data?                                                                                                                    | Pediatric surgeons who are interested in studies of Lung development.                                            |
| 8                   | For what type of analysis or purpose?                                                                                                               | To study neonatal lung development.                                                                              |
| 9                   | How or where can the data/documents be obtained?                                                                                                    | Emails could be sent to the address below to obtain the shared data:<br>Zheng-jintao@foxmail..com.               |
| 10                  | Any other restrictions?                                                                                                                             | We may balance the potential benefits and risks for each request and then provide the data that could be shared. |
